# Supplementary material for: Fast and accurate identification of pathogenic bacteria using excitation–emission spectroscopy and machine learning
Source: Royal Society of Chemistry journal article supplement (doi:10.1039/d4sd00070f), 2024-01-01
Supplement: d4sd00070f1.pdf [file d4sd00070f1.pdf]

## FAST AND ACCURATE IDENTIFICATION OF PATHOGENIC BACTERIA USING EXCITATION-EMISSION FLUORESCENCE SPECTROSCOPY AND MACHINE LEARNING

*Jacob Henry,<sup>1</sup> Jennifer Endres,<sup>2</sup> Marat R. Sadykov,<sup>2</sup> Kenneth W. Bayles,<sup>2</sup> Denis Svechkarev<sup>1\*</sup>*

<sup>1</sup> Department of Chemistry, University of Nebraska at Omaha, Omaha NE, United States

<sup>2</sup> Department of Pathology and Microbiology, University of Nebraska Medical Center, Omaha  
NE, United States

## SUPPLEMENTARY INFORMATION

|                                                                                              |    |
|----------------------------------------------------------------------------------------------|----|
| <b>Figure S1.</b> Neural network architecture .....                                          | S2 |
| <b>Figure S2.</b> Excitation-emission spectra of bacteria .....                              | S2 |
| <b>Figure S3.</b> Pattern differences between Gram-positive and Gram-negative bacteria ..... | S3 |
| <b>Figure S4.</b> Pattern differences in Gram-positive and Gram-negative bacteria .....      | S4 |
| <b>Figure S5.</b> Confocal fluorescence microscopy of representative bacteria .....          | S5 |
| <b>Figure S6.</b> ROC curve for the Gram status classification model .....                   | S6 |

\* Corresponding author: Department of Chemistry – Durham Science Center, University of  
Nebraska at Omaha, 6601 University Drive N, Omaha, NE 68182-0109;  
[dsvechkarev@unomaha.edu](mailto:dsvechkarev@unomaha.edu)

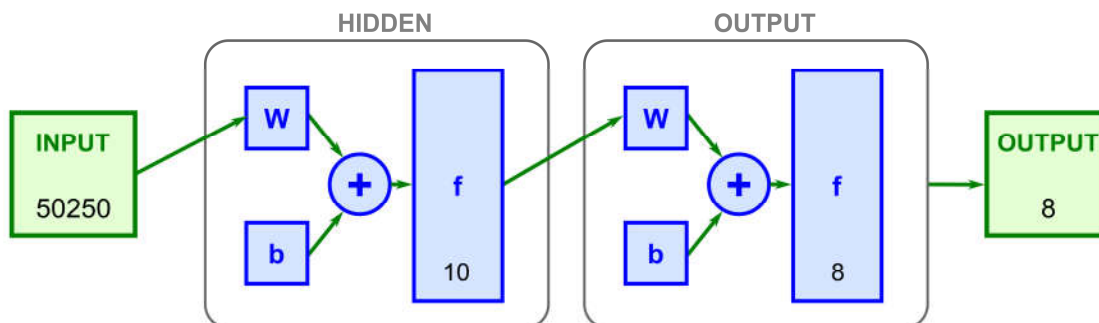

**Figure S1.** Architecture of the convolutional neural network used for bacterial pathogens classification.

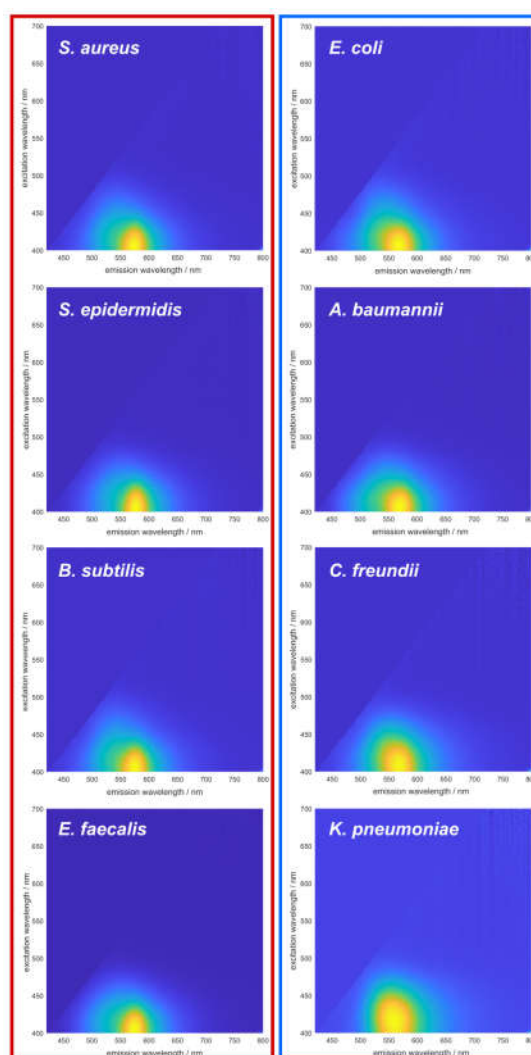

**Figure S2.** Excitation-emission spectra of Gram-positive (left) and Gram-negative (right) bacteria exhibit distinct Gram-status-specific shape patterns: for the Gram-negative microorganisms, fluorescence is shifted to the area of hydrogen-bonded complex emission (around 540-550 nm) and farther into longer-wavelength excitation (past 440-450 nm).

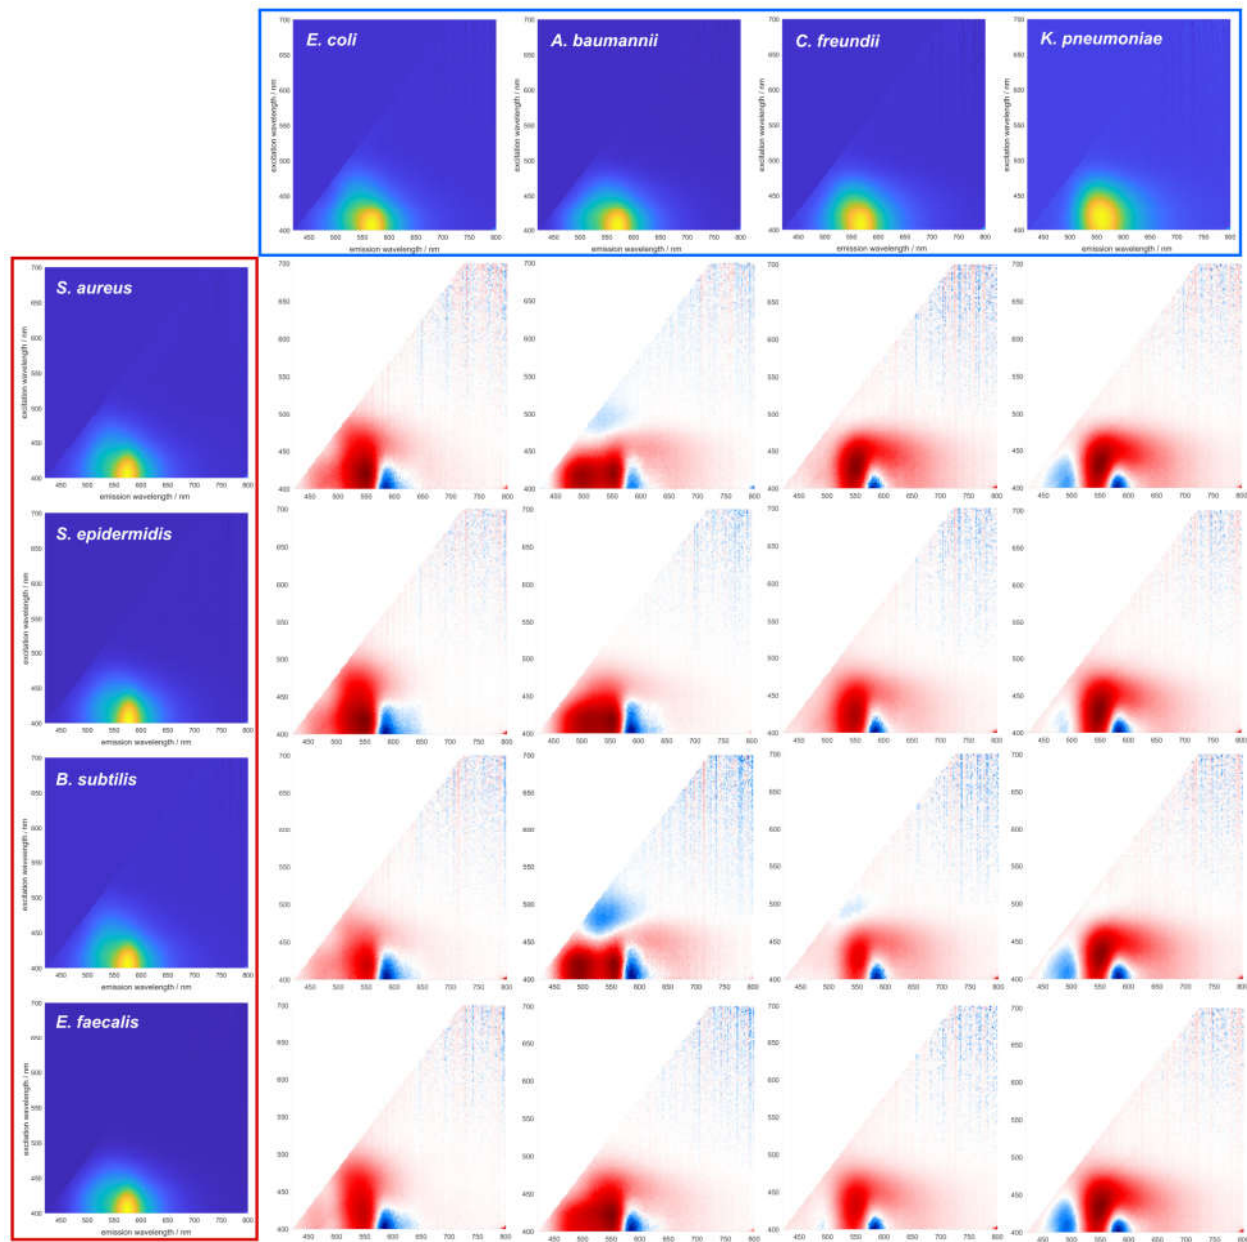

**Figure S3.** Excitation-emission spectra of Gram-positive and Gram-negative bacteria and the difference matrices illustrating the signals of Gram(+) bacteria subtracted from those of Gram(-) bacteria. A common pattern is observed where the emission intensity redistributes to the shorter wavelengths (red color = increase of intensity) and towards longer excitation wavelengths. At the same time, a decrease of intensity is observed in the area of the tautomeric fluorescence of DMAF (blue color).

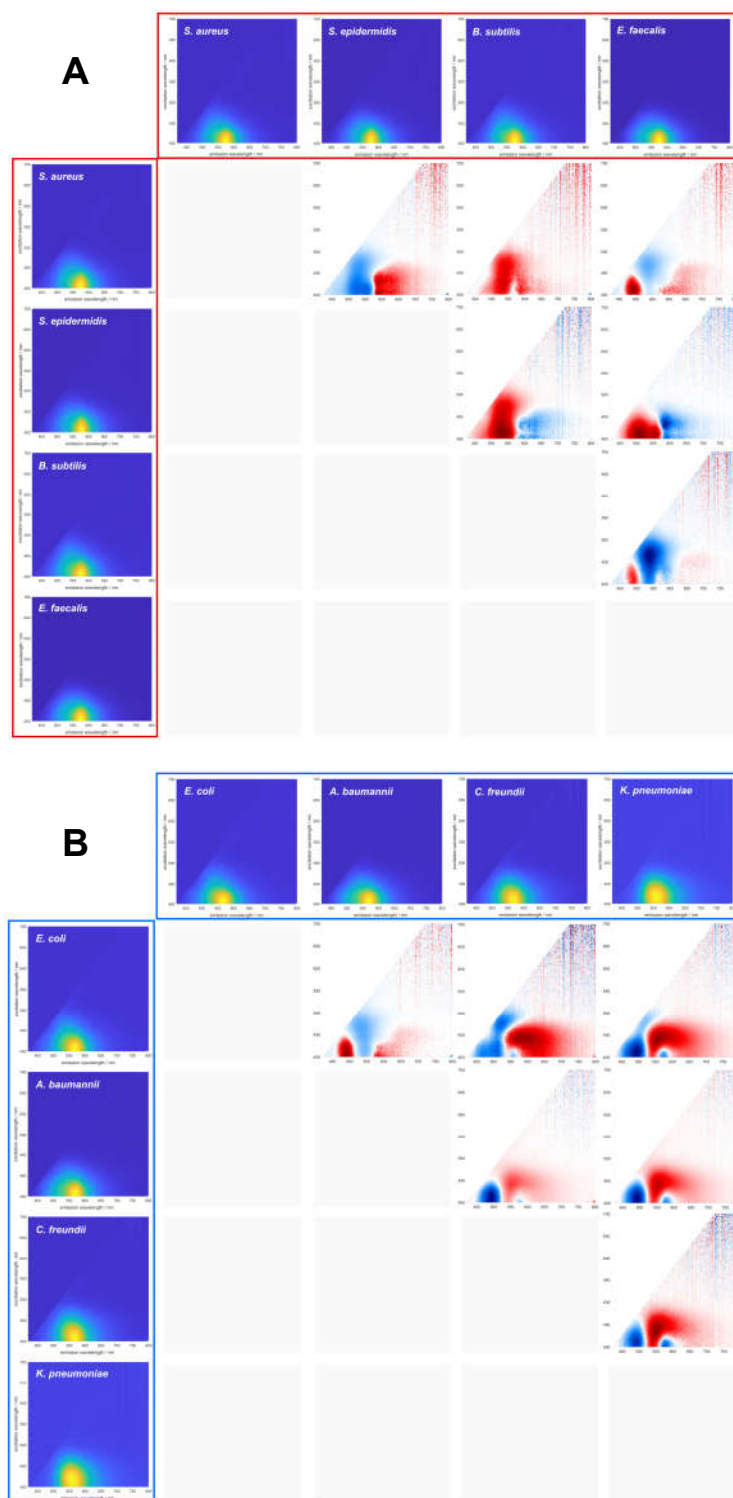

**Figure S4.** Difference spectra between Gram positive (A) and Gram-negative (B) bacteria illustrate more intricate variations in the excitation-emission signal within a group of bacteria representing the same Gram status, lacking a common trend that dominates the transition from Gram(+) to Gram(-) samples shown in Figure S2.

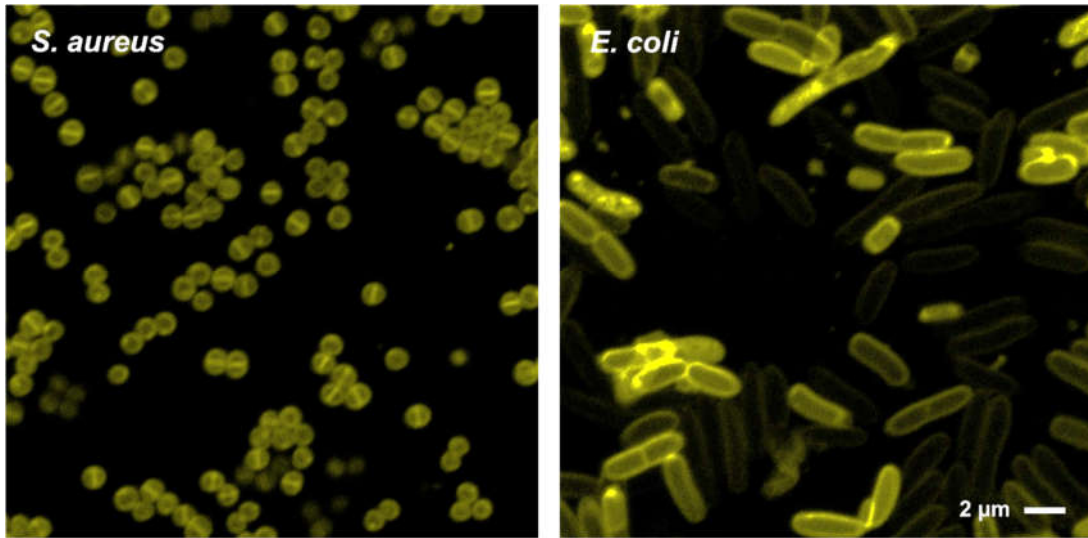

**Figure S5.** Confocal fluorescence microscopy of representative bacteria (*S. aureus* and *E. coli*) stained with DMAF confirms its localization in the cell envelope.

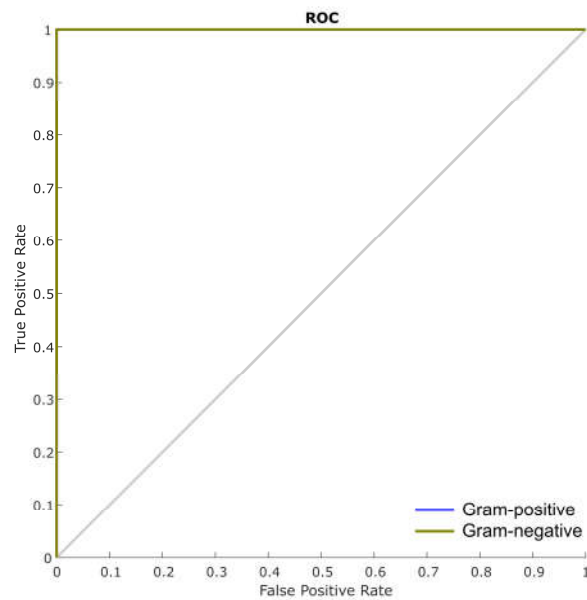

**Figure S6.** The receiver operating characteristic curve for the Gram status classification model.
